# Supplementary material for: p53 Represses the Oncogenic Sno-MiR-28 Derived from a SnoRNA
Source: PubMed Central journal article supplement (PMC4465335; doi:10.1371/journal.pone.0129190), 2015-06-10
Supplement: pone.0129190.s004.pdf [file pone.0129190.s004.pdf]

**Table 1. SNORDs or SNORAs repressed by wild-type p53 in H1299 cells**

| Gene Name | Accession Number | Fold Repression | Location | Precursor Transcript |
|-----------|------------------|-----------------|----------|----------------------|
| SNORD22   | NR_000008        | 2.19            |          |                      |
| SNORD25   | NR_002565        | 2.69            |          |                      |
| SNORD26   | NR_002564        | 3.12            |          |                      |
| SNORD27   | NR_002563        | 2.64            | 11q13    | SNHG1                |
| SNORD28   | NR_002562        | 2.74            |          |                      |
| SNORD30   | NR_002561        | 2.11            |          |                      |
| SNORD31   | NR_002560        | 1.91            |          |                      |
| SNORD74   | NR_002579        | 1.84            |          |                      |
| SNORD75   | NR_003941        | 1.81            | 1q25.1   | SNHG2                |
| SNORD78   | NR_003944        | 1.53            |          |                      |
| SNORD50A  | NR_002743        | 1.50            |          |                      |
| SNORD50B  | NR_003044        | 2.09            | 6q14.3   | SNHG5                |
| SNORD42B  | NR_000013        | 1.87            |          |                      |
| SNORD4A   | NR_000010        | 1.63            | 17q11    | RPL23A               |
| SNORD4B   | NR_000009        | 2.16            |          |                      |
| SNORA75   | NR_002921        | 2.07            | 2q37.1   | NCL                  |
| SNORA61   | NR_002987        | 1.66            | 1p35.5   | SNHG12               |
| SNORD34   | NR_000019        | 1.77            | 19q13.3  | RPL13A               |
| SNORA45   | NR_002977        | 2.07            | 11p15.4  | RPL27A               |
| SNORA64   | NR_002326        | 1.55            | 16p13.3  | RPS2                 |
| SNORD73A  | NR_000007        | 1.74            | 4q31.2   | RPS3A                |
| SNORA9    | NR_002952        | 1.68            | 7p13     | C7orf40              |
| SNORA56   | NR_002984        | 1.99            | Xq28     | DKC1                 |
| SNORD96A  | NR_002592        | 1.61            | 5q35.3   | GNB2L1               |
| SNORA71B  | NR_002910        | 1.57            | 20q11.23 | LOC388796            |
| SNORA55   | NR_002983        | 1.67            | 1p34.3   | PABPC4               |
| SNORD45C  | NR_003042        | 1.55            | 1p31.1   | RABGGTB              |
| SNORA40   | NR_002973        | 1.62            | 11q21    | -                    |
| SNORD3B-2 | NR_003924        | 2.68            | 17p11.2  | -                    |
| SNORD5    | NR_003033        | 1.70            | 11q21    | -                    |
