# Supplementary material for: p53 Represses the Oncogenic Sno-MiR-28 Derived from a SnoRNA
Source: PubMed Central journal article supplement (PMC4465335; doi:10.1371/journal.pone.0129190), 2015-06-10
Supplement: pone.0129190.s005.pdf [file pone.0129190.s005.pdf]

**Table 2. SNORDs or SNORAs repressed by wild-type p53 upon nutlin-3a treatment**

| Gene Name | Accession Number | Fold Repression | Location | Precursor Transcript |
|-----------|------------------|-----------------|----------|----------------------|
| SNORD22   | NR_000008        | 1.53            |          |                      |
| SNORD25   | NR_002565        | 2.09            |          |                      |
| SNORD26   | NR_002564        | 1.50            | 11q13    | SNHG1                |
| SNORD27   | NR_002563        | 1.59            |          |                      |
| SNORD28   | NR_002562        | 1.51            |          |                      |
| SNORA75   | NR_002921        | 1.56            | 2q37.1   | NCL                  |
